# Supplementary material for: Structural features of Dnase1L3 responsible for serum antigen clearance
Source: PubMed Central journal article supplement (PMC9381713; doi:10.1038/s42003-022-03755-5), 2022-08-16
Supplement: 42003_2022_3755_MOESM3_ESM.pdf [file 42003_2022_3755_MOESM3_ESM.pdf]

## Description of Additional Supplementary Files

**File name:** Supplementary Data 1

**Description:** : Data points for Supplementary Figure S4, panel c – RMSF plot. XLSX format.

**File name:** Supplementary Data 2

**Description:** Data points for Supplementary Figure S4, panel b – RMSD plot. XLSX format.

**File name:** Supplementary Data 3

**Description:** Data points for the ANS fluorescence in Figure 2 b. XLSX format.

**File name:** Supplementary Data 4

**Description:** Dataframe for Figure 2c, Estimated  $\Delta G$  of WT and R206C. XLXS format.

**File name:** Supplementary Data 5

**Description:** : Data points for Figure 4d. Active site calculated pKa values. Format XLXS.

**File name:** Supplementary Data 6

**Description:** Data for fluorescence Polarization. Format XLXS.

**File name:** Supplementary Data 7

**Description:** Data for Figure 5a. EC50. Format XLXS.

**File name:** Supplementary Data 8

**Description:** Data for Figure 5b. Barrier to transfection data. Format XLXS.

**File name:** Supplementary Data 9

**Description:** Data for Figure 5c. Immune Complex Degradation. Format XLXS.

**File name:** Supplementary Data 10

**Description:** Data for Figure 5d. EC50 for immune complex degradation. Format XLXS.

**File name:** Supplementary Data 11

**Description:** Data for Figure 6a. Fluorescence Polarization of DNA + CTD. Formation XLXS.

**File name:** Supplementary Data 12

**Description:** Excel Workbook of Figure 6c, circular dichroism data at various [DNA]. Format XLXS.

**File name:** Supplementary Data 13

**Description:** Excel Workbook of SAXS data for Figure 6e. Format XLXS.
